# Supplementary material for: TLE6 mutation causes the earliest known human embryonic lethality
Source: PubMed Central journal article supplement (PMC4634911; doi:10.1186/s13059-015-0792-0), 2015-11-05
Supplement: 13059_2015_792_MOESM1_ESM.pdf [file 13059_2015_792_MOESM1_ESM.pdf]

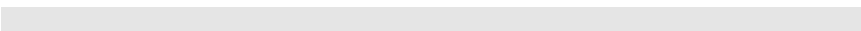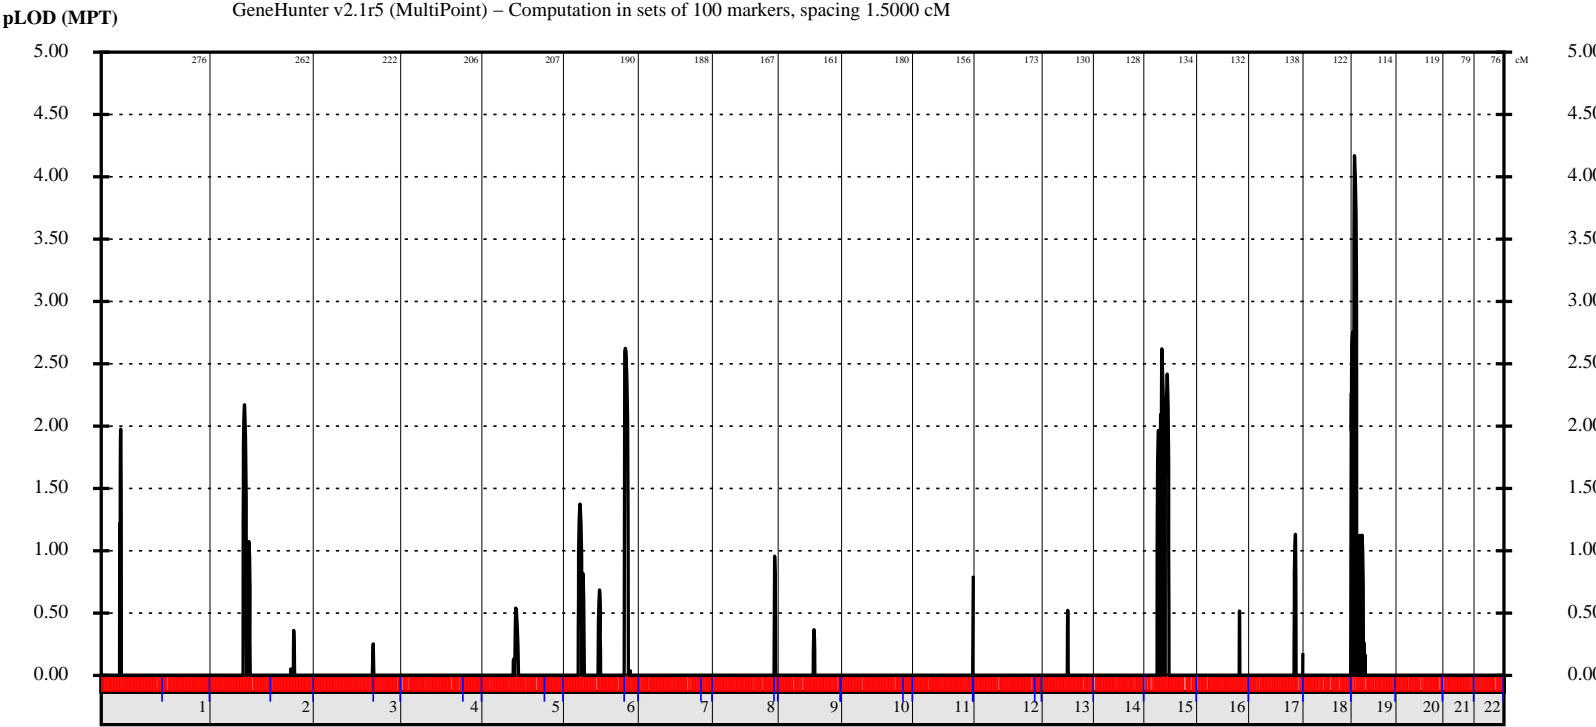

Marker coverage and chromosomes
